# Supplementary material
Source: PubMed Central journal article supplement (PMC4627789)

Supplementary Material for Online Publication

Table S1. GVHD grading table

| Score                                            | 0                                                       | 1                                                                                                                | 2                                                                                                                                                       | 3                                                                                                                                               |
|--------------------------------------------------|---------------------------------------------------------|------------------------------------------------------------------------------------------------------------------|---------------------------------------------------------------------------------------------------------------------------------------------------------|-------------------------------------------------------------------------------------------------------------------------------------------------|
| <b>1. Skin</b>                                   | <input type="checkbox"/> No skin changes (a-f)          |                                                                                                                  |                                                                                                                                                         |                                                                                                                                                 |
| a. Rash                                          | <input type="checkbox"/> No changes                     | <input type="checkbox"/> < 10% of BSA                                                                            | <input type="checkbox"/> 10 - 50% of BSA                                                                                                                | <input type="checkbox"/> > 50% of BSA                                                                                                           |
| b. Lichenoid changes                             | <input type="checkbox"/> No changes                     | <input type="checkbox"/> < 10% of BSA                                                                            | <input type="checkbox"/> 10 - 50% of BSA                                                                                                                | <input type="checkbox"/> > 50% of BSA                                                                                                           |
| c. Sclerodermatous changes                       | <input type="checkbox"/> No changes                     | <input type="checkbox"/> < 10% of BSA                                                                            | <input type="checkbox"/> 10 - 50% of BSA                                                                                                                | <input type="checkbox"/> > 50% of BSA                                                                                                           |
| d. Hyper or hypopigmentation                     | <input type="checkbox"/> No changes                     | <input type="checkbox"/> < 10% of BSA                                                                            | <input type="checkbox"/> 10 - 50% of BSA                                                                                                                | <input type="checkbox"/> > 50% of BSA                                                                                                           |
| e. Dry, flaky skin                               | <input type="checkbox"/> No changes                     | <input type="checkbox"/> < 10% of BSA                                                                            | <input type="checkbox"/> 10 - 50% of BSA                                                                                                                | <input type="checkbox"/> > 50% of BSA                                                                                                           |
| f. Alopecia                                      | <input type="checkbox"/> None                           | <input type="checkbox"/> Mild alopecia                                                                           | <input type="checkbox"/> Pronounced alopecia                                                                                                            |                                                                                                                                                 |
| <b>2. Joints</b>                                 | <input type="checkbox"/> No joint problems (a,b)        |                                                                                                                  |                                                                                                                                                         |                                                                                                                                                 |
| a. Contractures                                  | <input type="checkbox"/> No contractures                | --                                                                                                               | <input type="checkbox"/> Mild joint contractures (do not affect ADL)                                                                                    | <input type="checkbox"/> Severe joint contractures (affect activities of daily living)                                                          |
| b. Arthralgias/arthritides                       | <input type="checkbox"/> None                           | <input type="checkbox"/> Pain and/or inflammation not interfering with function                                  | <input type="checkbox"/> Pain and/or inflammation with either pain or pain meds interfering with function                                               | <input type="checkbox"/> Pain and/or inflammation with either pain or pain meds interfering with activities of daily living                     |
| <b>3. Oral</b>                                   | <input type="checkbox"/> No changes                     | <input type="checkbox"/> Painless erythema and/or lichenoid changes                                              | <input type="checkbox"/> Diffuse erythema, ulcers, and/or lichenoid changes with pain; able to eat most foods                                           | <input type="checkbox"/> Diffuse erythema, ulcers, and/or lichenoid changes with pain; unable to eat most foods                                 |
| <b>4. Ocular</b>                                 | <input type="checkbox"/> No changes                     | <input type="checkbox"/> Dryness of eyes, mild, not requiring treatment and/or asymptomatic keratoconjunctivitis | <input type="checkbox"/> Dryness of eyes requiring artificial tears or lacrimal plugging and/or symptomatic keratoconjunctivitis (ie. pain, irritation) | <input type="checkbox"/> Keratoconjunctivitis with pseudomembranes, corneal ulcerations, or loss of vision                                      |
| <b>5. Hepatic</b>                                |                                                         |                                                                                                                  |                                                                                                                                                         |                                                                                                                                                 |
| a. ALT (SGPT)                                    | <input type="checkbox"/> ≤ 2.5 x ULN                    | <input type="checkbox"/> > 2.5 – 5 x ULN                                                                         | <input type="checkbox"/> > 5 – 20 x ULN                                                                                                                 | <input type="checkbox"/> > 20 x ULN                                                                                                             |
| b. Bilirubin                                     | <input type="checkbox"/> ≤ 1.5 x ULN                    | <input type="checkbox"/> > 1.5 – 3 x ULN                                                                         | <input type="checkbox"/> > 3 – 10 x ULN                                                                                                                 | <input type="checkbox"/> > 10 x ULN                                                                                                             |
| c. Alkaline phosphatase                          | <input type="checkbox"/> ≤ 2.5 x ULN                    | <input type="checkbox"/> > 2.5 – 5 x ULN                                                                         | <input type="checkbox"/> > 5 – 20 x ULN                                                                                                                 | <input type="checkbox"/> > 20 x ULN                                                                                                             |
| <b>6. Esophagus</b>                              | <input type="checkbox"/> No dysphagia or odynophagia    | <input type="checkbox"/> Mild dysphagia, but can eat regular diet                                                | <input type="checkbox"/> Dysphagia or odynophagia (painful swallowing) requiring dietary changes                                                        | <input type="checkbox"/> Dysphagia requiring parenteral nutrition and/or web/stricture formation                                                |
| <b>7. Gastrointestinal</b>                       | <input type="checkbox"/> No GI symptoms (a-c)           |                                                                                                                  |                                                                                                                                                         |                                                                                                                                                 |
| a. Vomiting (chronic)                            | <input type="checkbox"/> No chronic vomiting            | <input type="checkbox"/> Vomiting, average 1x/24 hrs x > 1week                                                   | <input type="checkbox"/> Vomiting, average 2-5 x/24 hrs x > 1week                                                                                       | <input type="checkbox"/> Vomiting, average > 6x/24 hrs x > 1week                                                                                |
| b. Diarrhea (chronic)                            | <input type="checkbox"/> No chronic diarrhea            | <input type="checkbox"/> Increase of 2 -3 stools/day more than normal x > 1week                                  | <input type="checkbox"/> Increase of 4-6 stools/day more than normal, or nocturnal stools x > 1week                                                     | <input type="checkbox"/> Increase of > 7 stools/day more than normal, or incontinence, or need for parenteral support for dehydration x > 1week |
| c. Abdominal pain (chronic)                      | <input type="checkbox"/> No chronic abdominal pain      | <input type="checkbox"/> Mild pain/cramps, not interfering with function                                         | <input type="checkbox"/> Moderate pain/cramps; pain or analgesics interfering with function, but not ADL                                                | <input type="checkbox"/> Severe pain; pain or analgesics interfering with function and ADL                                                      |
| <b>8. Weight loss</b>                            | <input type="checkbox"/> < 5% weight loss               | <input type="checkbox"/> 5-10% loss                                                                              | <input type="checkbox"/> >10 - <20% loss                                                                                                                | <input type="checkbox"/> > 20% loss                                                                                                             |
| <b>9. Pulmonary</b>                              | <input type="checkbox"/> No pulmonary changes (a-e)     |                                                                                                                  |                                                                                                                                                         |                                                                                                                                                 |
| a. FVC                                           | <input type="checkbox"/> > 75% of predicted             | <input type="checkbox"/> ≥ 50 - 75% of predicted                                                                 | <input type="checkbox"/> ≥ 25 - <50% of predicted                                                                                                       | <input type="checkbox"/> < 25% of predicted                                                                                                     |
| b. FEV <sub>1</sub> (+FEV <sub>1</sub> /FVC<0.8) | <input type="checkbox"/> > 75% of predicted             | <input type="checkbox"/> ≥ 50 - 75% of predicted                                                                 | <input type="checkbox"/> ≥ 25 - <50% of predicted                                                                                                       | <input type="checkbox"/> < 25% of predicted                                                                                                     |
| c. DLCO (corrected)                              | <input type="checkbox"/> > 75% of predicted             | <input type="checkbox"/> ≥ 50 - 75% of predicted                                                                 | <input type="checkbox"/> ≥ 25 - <50% of predicted                                                                                                       | <input type="checkbox"/> < 25% of predicted                                                                                                     |
| d. Hypoxia                                       | <input type="checkbox"/> Normal                         | <input type="checkbox"/> ↓ O <sub>2</sub> sat with exercise                                                      | <input type="checkbox"/> ↓ O <sub>2</sub> sat at rest, needs O <sub>2</sub>                                                                             | <input type="checkbox"/> Needs CPAP or vent                                                                                                     |
| e. Dyspnea                                       | <input type="checkbox"/> No dyspnea                     | <input type="checkbox"/> Dyspnea with exertion                                                                   | <input type="checkbox"/> Dyspnea with normal activities                                                                                                 | <input type="checkbox"/> Dyspnea at rest or requiring ventilator support                                                                        |
| <b>10. Platelets</b>                             | <input type="checkbox"/> Platelets > 100,000            | --                                                                                                               | <input type="checkbox"/> Thrombocytopenia, platelets 50,000-99,000                                                                                      | <input type="checkbox"/> Severe thrombocytopenia, platelets < 50,000                                                                            |
| <b>11. Musculoskeletal</b>                       | <input type="checkbox"/> No serositis or myositis (a,b) |                                                                                                                  |                                                                                                                                                         |                                                                                                                                                 |

|                                                 |                                 |                                                                         |                                                                                           |                                                                                         |
|-------------------------------------------------|---------------------------------|-------------------------------------------------------------------------|-------------------------------------------------------------------------------------------|-----------------------------------------------------------------------------------------|
| a. Serositis                                    | <input type="checkbox"/> None   | <input type="checkbox"/> Asymptomatic                                   | <input type="checkbox"/> Symptomatic, requiring medical intervention or single aspiration | <input type="checkbox"/> Symptomatic, requiring surgical intervention, drain, or window |
| b. Myositis                                     | <input type="checkbox"/> None   | <input type="checkbox"/> Pain or weakness not interfering with function | <input type="checkbox"/> Pain or weakness interfering with function but not ADL           | <input type="checkbox"/> Pain or weakness interfering with activities of daily living   |
| <b>12. Performance (Karnofsky/Lansky score)</b> | <input type="checkbox"/> 90-100 | <input type="checkbox"/> 70-80                                          | <input type="checkbox"/> 50-60                                                            | <input type="checkbox"/> <50                                                            |

ADL – activities of daily living; ULN – upper limit of normal; FVC – forced vital capacity; FEV1 – forced expiratory volume in 1 second; DLCO – diffusion capacity for carbon monoxide

## **SUPPLEMENTARY FIGURE LEGENDS**

Figure S1. Flow of participants in ASCT0031.

Figure 1.

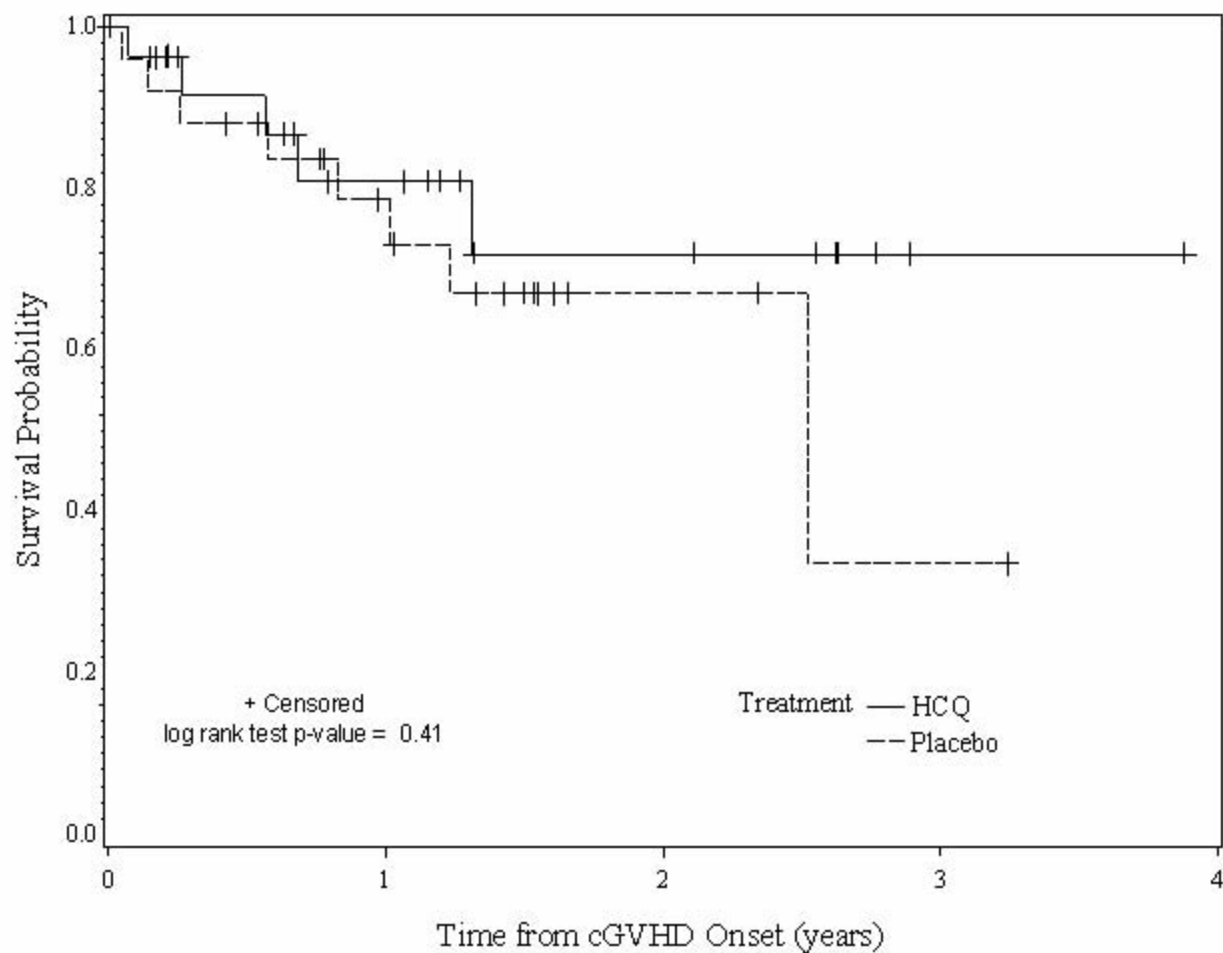

Supplement: NIHMS303785-supplement-01.pdf [file NIHMS303785-supplement-01.pdf]
